# Supplementary material for: Promoter hypermethylation of the AE2/SLC4A2 gene in PBC
Source: PubMed Central journal article supplement — JHEP Rep. 2019 Jun 7;1(3):145–53. doi: 10.1016/j.jhepr.2019.05.006 (PMC7001545; doi:10.1016/j.jhepr.2019.05.006), 2019-06-07
Supplement: mmc2.pdf [file mmc2.pdf]

## Journal of Hepatology

### CTAT methods

Tables for a “Complete, Transparent, Accurate and Timely account” (CTAT) are now mandatory for all revised submissions. The aim is to enhance the reproducibility of methods.

- Only include the parts relevant to your study
- Refer to the CTAT in the main text as ‘Supplementary CTAT Table’
- Do not add subheadings
- Add as many rows as needed to include all information
- Only include one item per row

**If the CTAT form is not relevant to your study, please outline the reasons why:**

|  |
|--|
|  |
|--|

#### 1.1 Antibodies

No antibodies were used in this study

#### 1.2 Cell lines

| Name       | Citation                                                              | Supplier | Cat no.  | Passage no. | Authentication test method              |
|------------|-----------------------------------------------------------------------|----------|----------|-------------|-----------------------------------------|
| 174xCEM.T2 | Thierry S, <i>et al.</i><br><i>Mol Cancer Ther</i><br>2017,16:2817-27 | ATCC     | CRL-1992 | 5-10        | GenePrint® 10 System (Promega, WI, USA) |

#### 1.3 Organisms

No organisms/animals were used in this study.

#### 1.4 Sequence based reagents

| Name           | Sequence                                                                                                                                                                                    | Supplier                                                                                                                              |
|----------------|---------------------------------------------------------------------------------------------------------------------------------------------------------------------------------------------|---------------------------------------------------------------------------------------------------------------------------------------|
| AE2a promoter  | CpG sites –351, –348, –342, –329, –312, –310, –304, –299, –291, –286, –274, –272, –266, –260, –258, –254, –249, –246 bp relative to A in ATG start codon within exon 2 of AE2a transcript   | Treated with EpiTect-Bisulphite Kit (QIAGEN, Hilden, Germany), and analysed by PyroMark™ Q96 pyrosequencer (QIAGEN, Hilden, Germany)  |
| AE2b1 promoter | CpG sites –348, –330, –292, –279, –257, –255, –227 bp relative to A in ATG start codon within exon 1b1 of AE2b1 transcript                                                                  | Treated with EpiTect-Bisulphite Kit (QIAGEN, Hilden, Germany), and analysed by PyroMark™ Q96 pyrosequencer (QIAGEN, Hilden, Germany). |
| AE2b2 promoter | CpG sites –447, –415, –351, –307, –296, –280, –263, –261, –244, –237, –228, –218, –205, –190, –172, –163, –111, –94 bp relative to A in ATG start codon within exon 1b2 of AE2b2 transcript | Treated with EpiTect-Bisulphite Kit (QIAGEN, Hilden, Germany), and analysed by PyroMark™ Q96 pyrosequencer (QIAGEN, Hilden, Germany). |

## 1.5 Biological samples

| Description   | Source                                                                                           | Identifier                                                       |
|---------------|--------------------------------------------------------------------------------------------------|------------------------------------------------------------------|
| Liver biopses | Biobanks – Clinic University of Navarra (Pamplona, Spain) and Hospital Clinic (Barcelona, Spain) | Patient ID                                                       |
| PBMCs         | Biobanks – Clinic University of Navarra (Pamplona, Spain) and Hospital Clinic (Barcelona, Spain) | Patient ID or anonymized ID from healthy blood-donors/volunteers |

## 1.6 Deposited data

No data is deposited for this study

## 1.7 Software

| Software name    | Manufacturer                                                  | Version |
|------------------|---------------------------------------------------------------|---------|
| PyroQ-CpG™       | Biotage-QIAGEN (Hilden, Germany)                              | 1.0.9   |
| Genesis          | Thallinger Lab, Graz University of Technology (graz, Austria) | 1.8.1   |
| GraphPad Prism 5 | GraphPad Software (La Jolla, CA, USA)                         | 5       |

## 1.8 Other (e.g. drugs, proteins, vectors etc.)

| Name                   | Supplier      | Cat No. |
|------------------------|---------------|---------|
| 5-aza-2'-deoxycytidine | Sigma-Aldrich | A3656   |
| Trichostatin A         | Sigma-Aldrich | T1952   |

## 1.9 Please provide the details of the corresponding methods author for the manuscript:

Juan F. Medina, MD, PhD. Center for Applied Medical Research (CIMA) and School of Medicine, University of Navarra, Pamplona, Spain.

Email: [jfmedina@unav.es](mailto:jfmedina@unav.es)

## 2.0 Please confirm for randomised controlled trials all versions of the clinical protocol are included in the submission. These will be published online as supplementary information.

No randomised controlled trials are included in this manuscript
